# Supplementary material for: Experiences and requirements in nutritional management of patients with esophageal cancer: a systematic review and qualitative meta-synthesis
Source: Springer Nature journal article supplement (doi:10.1007/s00520-023-08100-y), 2023-10-16
Supplement: MOESM1 [file 26186318]

**Article title:** Experiences and needs in nutrition management for patients with esophageal cancer: a systematic review and qualitative meta-synthesis

**Journal name:** Supportive Care in Cancer

**Author names:** Xinwei Wang; Xingyu Liu; Zhie Gu; Xiaojie Li; Yusheng Shu

**Affiliation and e-mail address of the corresponding author:** Northern Jiangsu People’s Hospital, 98 Nantong West Road, Yangzhou, 225001, Jiangsu Province, China; E-mail: 18051061999@yzu.edu.cn

## Multimedia Appendix 1: Search strategies

PubMed

#1 Search: Esophageal Neoplasm*[MeSH Terms]

#2 Search: ((((Esophagus Neoplasm*[Title/Abstract]) OR (Cancer of Esophagus[Title/Abstract])) OR (Cancer of the Esophagus[Title/Abstract])) OR (esophagus Cancer*[Title/Abstract])) OR (Esophageal Cancer*[Title/Abstract])

#3 #1 OR #2

#4 Search: Nutrition Therapy[MeSH Terms]

#5 Search: (((Therapy, Nutrition[Title/Abstract]) OR (Medical Nutrition Therapy[Title/Abstract])) OR (Nutrition Therapy, Medical[Title/Abstract])) OR (Therapy, Medical Nutrition[Title/Abstract])

#6 #4 OR #5

#7 Search: Nutritional Support[MeSH Terms]

#8 Search: ((Support, Nutritional[Title/Abstract]) OR (Artificial Feeding[Title/Abstract])) OR (Feeding, Artificial[Title/Abstract])

#9 #7 OR #8

#10 Search: (Nutrition management[Title/Abstract]) OR (Nutrition[Title/Abstract])

#11 Search: (((eat[Title/Abstract]) OR (eating[Title/Abstract])) OR (diet*[Title/Abstract])) OR (food*[Title/Abstract])

#12 #6 OR #9 OR #10 OR #11

#13 Search: (((((experience[Title/Abstract]) OR (need*[Title/Abstract])) OR (feeling*[Title/Abstract])) OR (perception*[Title/Abstract])) OR (interview[Title/Abstract])) OR (attitude[Title/Abstract])

#14 Search: (((((((((qualitative study[Title/Abstract]) OR (qualitative research[Title/Abstract])) OR (qualitative methodology[Title/Abstract])) OR (phenomenological research[Title/Abstract])) OR (,phenomenological study[Title/Abstract])) OR (ethnographic research[Title/Abstract])) OR (ethnographic study[Title/Abstract])) OR (ethnographic analysis[Title/Abstract])) OR (grounded theory[Title/Abstract])) OR (thematic analysis[Title/Abstract])

#15 #3 AND #12 AND #13 AND #14

Wanfang

#1 Ti/KW:(食管癌 or 食道癌 or 食管肿瘤 or 食道肿瘤)

#2 Ti/KW:(营养管理 or 营养治疗 or 营养护理 or 营养 or 进食 or 饮食 or 食物)

#3 Ti/KW:(体验 or 经历 or 经验 or 感受 or 态度 or 需求 or 访谈 or 看法 or 认知 or 质性研究 or 定性研究 or 现象学 or 扎根理论 or 人类学 or 集中研讨小组)

#4 #1 AND #2 AND #3
